# Supplementary material for: Transcriptome-based network analysis related to M2-like tumor-associated macrophage infiltration identified VARS1 as a potential target for improving melanoma immunotherapy efficacy
Source: Springer Nature journal article supplement (doi:10.1186/s12967-022-03686-z), 2022-10-27
Supplement: MOESM1 [file 23646764]

1 **Transcriptome-based network analysis related to M2-like tumor-associated mac-**  
2 **rophage infiltration identified VARS1 as a potential target for improving mela-**  
3 **noma immunotherapy efficacy**

4  
5 Zhengquan Wu<sup>1,2#</sup>, Ke Lei<sup>3#</sup>, Huaizhi Li<sup>4</sup>, Jiali He<sup>5</sup>, Enxian Shi<sup>1\*</sup>

6  
7 1 Department of Otorhinolaryngology, Head and Neck Surgery, University of Munich,  
8 Munich 81377, Germany

9 2 Walter Brendel Center for Experimental Medicine, University of Munich, Munich  
10 81377, Germany

11 3 Department of Dermatology, The Second People's Hospital of Chengdu, Chengdu,  
12 610021, People's Republic of China

13 4 Department of Endocrinology, Shenzhen University General Hospital, Shenzhen Uni-  
14 versity, Shenzhen, 518055, People's Republic of China

15 5 Shenzhen Healthcare Committee Office, Shenzhen, 518020, People's Republic of  
16 China

17 # These authors have contributed equally

18  
19 \* Correspondence:

20 Enxian Shi

21 Enxian.Shi@med.uni-muenchen.de

22

23 **Abstract**

24 **Rationale:** The M2-like tumor-associated macrophages (TAMs) are independent prog-  
25 nostic factors in melanoma.

26 **Methods:** We performed weighted gene co-expression network analysis (WGCNA) to  
27 identify the module most correlated with M2-like TAMs. The Cancer Genome Atlas  
28 (TCGA) patients were classified into two clusters that differed based on prognosis and  
29 biological function, with consensus clustering. A prognostic model was established  
30 based on the differentially expressed genes (DEGs) of the two clusters. We investigated  
31 the difference in immune cell infiltration and immune response-related gene expression  
32 between the high and low risk score groups.

33 **Results:** The risk score was defined as an independent prognostic value in melanoma.  
34 *VARSI* was a hub gene in the M2-like macrophage-associated WGCNA module that the  
35 DepMap portal demonstrated was necessary for melanoma growth. Overexpressing  
36 *VARSI in vitro* increased melanoma cell migration and invasion, while downregulating  
37 *VARSI* had the opposite result. *VARSI* overexpression promoted M2 macrophage po-  
38 larization and increased TGF- $\beta$ 1 concentrations in tumor cell supernatant *in vitro*.  
39 *VARSI* expression was inversely correlated with immune-related signaling pathways  
40 and the expression of several immune checkpoint genes. In addition, the *VARSI* ex-  
41 pression level helped predict the response to anti-PD-1 immunotherapy. Pan-cancer  
42 analysis demonstrated that *VARSI* expression negatively correlated with CD8 T cell  
43 infiltration and the immune response-related pathways in most cancers.

44 **Conclusions:** We established an M2-like TAM-related prognostic model for melanoma

45 and explored the role of VARS1 in melanoma progression, M2 macrophage polarization,  
46 and the development of immunotherapy resistance.

47

48 **Key words:** Tumor associated macrophages; melanoma; macrophage polarization; im-  
49 munotherapy; prognostic model; VARS1

50

## 51 **Introduction**

52 Melanoma is a highly aggressive skin cancer with early metastases and have the highest  
53 mortality rate in skin cancer<sup>43</sup>. Its incidence has increased in recent years and it has  
54 become one of the fastest growing tumors. Diagnosis rates are also increasing among  
55 young people<sup>44</sup>. Despite the recent advances in neoadjuvant immunotherapy, chemo-  
56 therapy, and targeted therapy improving patient prognosis, many patients only achieve  
57 temporary remission and eventually develop therapy resistance. Therefore, the mortal-  
58 ity rates continue to be unacceptably high<sup>2, 24</sup>.

59 Bone marrow-derived cells penetrate the tumor and differentiate into macro-  
60 phages termed tumor-associated macrophages (TAMs), which are the main component  
61 of tumor-infiltrating leukocytes<sup>49</sup>. Most TAMs not only lose the ability to combat tumor  
62 progression but also support tumor cell growth and metastasis<sup>3, 40</sup>. TAMs help to build  
63 an immune dysfunctional microenvironment in tumors by secreting many immunosup-  
64 pressive cytokines<sup>5, 26</sup>. Furthermore, as a major source of PD-L1, TAMs inhibit cyto-  
65 toxic T cell infiltration and function, which drives undesirable resistance to neoadjuvant  
66 immunotherapy<sup>33</sup>. In tumors, TAMs predominantly polarize into the pro-tumoral M2

67 phenotype<sup>32, 48</sup> and a high M2/M1 ratio is an independent prognostic factor in many  
68 cancers, especially melanoma<sup>12, 34, 48</sup>. Therefore, it is necessary to describe molecular  
69 characteristics combining patients' M2-like TAMs infiltration and to determine the key  
70 regulatory factors of M2-like TAM polarization.

71 To provide new insights into the molecular features of M2-like TAM infiltration  
72 in patients with melanoma, we identified two distinct clusters (Cluster 1 and Cluster 2)  
73 based on the gene module most positively correlated with M2-like TAM infiltration in  
74 The Cancer Genome Atlas skin cutaneous melanoma (TCGA-SKCM) dataset. Then,  
75 we investigated the differences in prognosis, multi-omics, and functional enrichment  
76 between the two clusters. Next, we constructed a prognostic model according to the  
77 differentially expressed genes (DEGs) of the two clusters and compared the prognosis,  
78 immune cell infiltration, immune-related gene profile, and immunotherapy response in  
79 the high- and low-risk groups.

80 Subsequently, *VARSI* was characterized as the hub gene of the module most  
81 associated with M2-like TAM infiltration, which suggested that *VARSI* is linked to  
82 TAM polarization and could be defined as a new potential target in melanoma progres-  
83 sion. *VARSI* is a member of the aminoacyl-tRNA synthetases (ARSs) and its primary  
84 function is to link valines to their corresponding tRNAs in protein synthesis<sup>28</sup>. *VARSI*  
85 mainly plays an important role in progressive brain disease<sup>14</sup>. Walbrecq et al. proved  
86 that hypoxia induced *VARSI*-bearing extracellular vesicle secretion by melanoma,  
87 which correlated with worse melanoma outcomes<sup>60</sup>. Nevertheless, the role of *VARSI*  
88 in melanoma remains unclear.

89 Our study demonstrates that VARS1 expression was negatively correlated with  
90 the immune-related signaling pathways and the infiltration of antitumor cells such as  
91 CD8 T cells but was positively correlated with the accumulation of M2-like TAMs.  
92 VARS1 overexpression promoted M2-like macrophage polarization and melanoma cell  
93 migration and invasion *in vitro*, while knockdown of VARS1 decreased melanoma cell  
94 migration and invasion. VARS1 was inversely correlated with several immune check-  
95 point genes and could be a predictive biomarker of anti-PD-1 immunotherapy response.  
96 Furthermore, pan-cancer analysis revealed that VARS1 correlated negatively with CD8  
97 T cell infiltration in most cancers and demonstrated unfavorable prognostic value in  
98 several cancers.

99

## 100 **Materials and methods**

### 101 *Dataset source and preprocessing*

102 The analyses involved patients from four SKCM cohorts (GSE65904, GSE98394,  
103 GSE78220, GSE91061) and TCGA-SKCM. Patients without survival information and  
104 RNA sequencing (RNA-seq) data were excluded from the analysis. For the Gene Ex-  
105 pression Omnibus (GEO) dataset, related clinical data and transcriptome expression  
106 data were downloaded using the R GEOquery package<sup>8</sup> and the related GEO datasets  
107 were merged using the ComBat algorithm<sup>31</sup>. Transcriptome FPKM (fragments per  
108 kilobase transcript per million fragments) value and clinical data were downloaded  
109 from the Genomic Data Commons (GDC, <https://portal.gdc.cancer.gov/>) using the R  
110 TCGAbiolinks package<sup>7</sup>. The FPKM values were transformed to TPM (transcripts per

111 million) values for subsequent analyses.

112

### 113 *Weighted gene co-expression network analysis (WGCNA)*

114 We constructed mRNA co-expression networks in TCGA-SKCM dataset using the R  
115 WGCNA package<sup>29</sup>. First, the Pearson correlation coefficient between each pair of  
116 genes was calculated to obtain a similarity matrix. WGCNA converted the similarity  
117 matrix to an adjacency matrix using a power function. Among all soft thresholds ( $\beta$ )  
118 with  $R^2 > 0.9$ , we chose the automatic value  $\beta$  ( $\beta = 5$ ) returned by the WGCNA  
119 pickSoftThreshold function. As recommended by the WGCNA guidelines, 0.25 was  
120 chosen as the network merge height. We used default settings for other WGCNA pa-  
121 rameters.

122

### 123 *M2-like TAM infiltration-related cluster acquisition*

124 We selected the module associated with the infiltration of M2-like TAMs and CD8 T  
125 cells and the genes in this module underwent univariate Cox regression analysis. Then,  
126 the 125 genes associated with survival in univariate analysis ( $p < 0.05$ ) were entered  
127 into the R ConsensusClusterPlus package<sup>62</sup> to perform consensus clustering for TCGA-  
128 SKCM patients. The optimal K value was identified as 2 based on the result of the  
129 cluster consensus value and cumulative distribution function.

130

### 131 *Development of the M2-like TAM-related prognostic model*

132 The DEGs of two clusters with a false discovery rate (FDR)  $< 0.05$  were identified by

133 the R DESeq2 package<sup>36</sup>. Then, the 10,269 DEGs underwent univariate Cox analysis  
134 in TCGA dataset and yielded 3390 progression-associated genes ( $p < 0.05$ ). Further  
135 reduction of candidate genes using lasso (least absolute shrinkage and selection opera-  
136 tor) logistic regression with 10-fold cross-validation was performed via the R glmnet  
137 package<sup>13</sup>. Then, the genes were filtered further using a multivariate proportional haz-  
138 ard regression model (using both stepwise regression). The risk score was calculated as  
139 follows:  $0.323 \times \text{ATP13A5} + 0.465 \times \text{C1orf105} + 0.195 \times \text{TM6SF2} + 0.151 \times \text{HEYL} +$   
140  $0.146 \times \text{PTK6} + 0.065 \times \text{KIT} + 0.049 \times \text{ENTHD1} - 0.209 \times \text{SLC18A1} - 0.201 \times \text{ZMAT1} -$   
141  $0.158 \times \text{CD14}$ . The TCGA and validation cohort risk scores used the same model score  
142 threshold. Patients were stratified into low- and high-risk groups based on the median  
143 risk score cut-off and the differences in overall survival (OS) were compared using the  
144 R survival package<sup>56</sup>. The area under the curve (AUC) was calculated with the R tim-  
145 eROC package<sup>35</sup> to evaluate the accuracy of the prognostic model.

146

#### 147 *Functional enrichment analysis and estimation of immune cell infiltration*

148 Gene set variation analysis (GSVA) and gene set enrichment analysis (GSEA) were  
149 performed with the gsva<sup>20</sup> and clusterProfiler<sup>65</sup> packages in R, respectively. The gene  
150 sets for GSVA and GSEA were downloaded from the Molecular Signatures Database  
151 (MSigDB) v7.4 database. Immune cell infiltration was quantified using the CIBER-  
152 SORT algorithm<sup>47</sup> based on the TPM value of TCGA-SKCM patients.

153

#### 154 *Analysis of genomic alterations*

155 Somatic mutations and somatic copy number alterations (CNAs) were downloaded  
156 from GDC using the R TCGAbiolinks package. The somatic mutations and CNAs  
157 (GISTIC output) data were visualized using the R maftools package<sup>41</sup>. The significant  
158 CNA amplifications and deletions were identified by GISTIC 2.0<sup>42</sup>. The methylation  
159 data of TCGA patients were downloaded from the GDC portal. Differentially methyl-  
160 ated CpGs between Cluster 1 and Cluster 2 were examined with the t-test. CpGs in  
161 chromosomes X and Y were excluded from the analysis. CpGs with FDR < 0.05 were  
162 characterized as differentially methylated CpGs.

163

#### 164 *Protein–protein interaction (PPI) network construction and hub gene identification*

165 The STRING database (v.11.5) was used to establish PPIs between genes in the  
166 WGCNA module with a confidence level of 0.4, and the interaction network was visu-  
167 alized using Cytoscape. The hub genes of the WGCNA module were screened with the  
168 Closeness, Stress, and Radiality algorithms of the cytoHubba plugin<sup>6</sup> in Cytoscape.

169

#### 170 *Cell culture and transfection*

171 We used SK-MEL-28 (ATCC, Cellcook Biotechnology, Guangzhou, China), A375  
172 (ATCC, Cellcook Biotechnology, **Guangzhou, China**), and THP1 cells (ATCC, Cell-  
173 cook Biotechnology, **Guangzhou, China**) for *in vitro* experiments. A375 and SK-MEL-  
174 28 cells were maintained in Dulbecco's modified Eagle's medium (DMEM) supple-  
175 mented with 10% fetal bovine serum (FBS) and 1% penicillin-streptomycin (all from  
176 Gibco, Carlsbad, CA, USA). The THP1 cells were cultured in RPMI 1640 medium



177 containing 10% FBS, 1% penicillin-streptomycin, 2 mM glutamine, 10 mM HEPES,  
178 and 1× non-essential amino acids (all from Gibco).

179 The VARS1 overexpression (pCR4-TOPO-VARS1) and control vector plasmids  
180 were purchased from Miaoling Company (Miaoling, Wuhan, China) and the small in-  
181 terfering RNAs (siRNAs) targeting VARS1 and the siRNA control were purchased from  
182 RiboBio (Guangzhou, China). The sequences of the *VARS1*-targeting siRNAs were as  
183 follows: GGAAACGCTCCCTGTCACAAA (VARS1 siRNA1) and GCCGGATCTG-  
184 GAATAATGTGA (VARS1 siRNA2). For transient transfection, A375 and SK-MEL-  
185 28 cells were transfected with overexpression plasmid or siRNAs, respectively, using  
186 transfection reagents (Lipofectamine 3000, Invitrogen, CA, USA) for 48 h, followed  
187 by further functional assays.

188

#### 189 *Quantitative real-time PCR (qRT-PCR) and western blotting*

190 Total RNA extraction and qRT-PCR were conducted as previously described<sup>64</sup>. The  
191 qRT-PCR forward and reverse primer sequences were as follows: (1)  $\beta$ -actin,  
192 CTCGCCTTTGCCGATCC and TTCTCCATGTCGTCCCAGTT; and (2) VARS1,  
193 CCGTGCTAGGAGAAGTGGTT and TCTCTGGTTTTGGTTTCTTCTCCC, respec-  
194 tively. The western blotting was performed as previously described (36) with primary  
195 antibodies against VARS1 (WH0007407M1, Sigma, Germany) and  $\alpha$ -tubulin (A11126,  
196 Invitrogen, CA, USA).

197

#### 198 *Transwell migration and invasion assays*

199 The migration and invasion assays were performed as previously described<sup>64</sup>. After  
200 cleaning the cells on the top of the insert, cells growing through the porous membrane  
201 were photographed with an inverted light microscope ( $\times 100$ ). The relative numbers of  
202 migrating and invasive cells were calculated using ImageJ (ImageJ National Institutes  
203 of Health, USA).

204

#### 205 *Flow cytometry*

206 THP1 cells were treated with 320 nM phorbol-12-myristate-13-acetate (PMA) for 6 h  
207 and differentiated into macrophages, then maintained in the medium with PMA for 16  
208 h to generate M0 cells as described before<sup>17, 37, 52, 63</sup>. To analyze the influence of VARS1  
209 on macrophage polarization, we collected the culture supernatants of VARS1-overex-  
210 pressing A375 cells at 24 h. For the CM collection method, we first seeded equal num-  
211 bers (1 million cells) of VARS1-overexpressed and control cells separately in 100 mm  
212 tissue culture dishes with complete medium. When cells have grown to 70% to 80%  
213 confluency, replace the medium with fresh serum-free medium. After 24 hours of cell  
214 culture, CM was collected and passed through a 0.22  $\mu\text{m}$  filter (Millipore). Then we  
215 added the supernatant to THP-1 cell culture medium and continue to culture M0 THP1  
216 cells. After 4 days, the THP1 cells were harvested and stained with CD86 (#374202,  
217 BioLegend) and CD206 (#321102, BioLegend). After 45-min incubation on ice, the  
218 cells were washed three times with phosphate-buffered saline (PBS) buffer and resus-  
219 pended in fluorescence-activated cell sorting (FACS) buffer (2% FBS in PBS buffer)  
220 for flow cytometric analysis.

221

222 *Analysis of the immunotherapy response*

223 We integrated two datasets of patients with melanoma treated with anti-PD-1  
224 (GSE78220 and GSE91061). Further analyses were performed only on treatment-naïve  
225 patients. Then, the immunotherapy response was predicted using the SubMap online  
226 tool<sup>30</sup>.

227

228 *Statistical analysis*

229 Survival differences between groups were assessed using Kaplan-Meier curves and log-  
230 rank tests. Prognostic factors were determined with univariate and multivariate Cox  
231 regression analyses. Correlation coefficients were calculated by Pearson and Spearman  
232 correlation analyses. Normal and non-normal variables were compared using the un-  
233 paired Student t-test and the Mann-Whitney U test, respectively. One-way analysis of  
234 variance and the Kruskal-Wallis test were used as parametric and nonparametric meth-  
235 ods, respectively, for comparing >2 groups. Genes with differential mutations and dif-  
236 ferential copy number losses and gains were examined with chi-square and Fisher's  
237 exact tests. The statistical analysis was performed using R software and values repre-  
238 sent the mean ± standard deviation. P < 0.05 was considered statistically significant.

239

240 **Results**

241 *Identification of M2-like TAM-related cluster*

242 First, we used the CIBERSORT algorithm to assess the fraction of immune cell

243 infiltration in patients. In TCGA and GSE98394 datasets, patients with a higher propor-  
244 tion of M2 macrophage infiltration had worse prognosis (Figure 1A and Figure S1A).  
245 Considering that more M2 macrophages appeared to be associated with poorer progno-  
246 sis and CD8 T cell infiltration, we performed WGCNA to detect the module related to  
247 CD8 T cell and M2 macrophage infiltration (Figure S1D). We select the soft threshold  
248 power  $\beta = 5$  (scale-free  $R^2 = 0.90$ ) to construct a scale-free network (Figures S1B, S1C).

249 The heatmap demonstrates that the yellow module was negatively and posi-  
250 tively correlated with the infiltration of CD8<sup>+</sup> T cells and M2 macrophages, respec-  
251 tively, in TCGA-SKCM (Figure 1B). We used the genes in the yellow module and sur-  
252 vival data in TCGA-SKCM dataset to perform univariate Cox regression analysis, and  
253 125 genes were associated with OS in TCGA-SKCM. We used the R ConsensusClus-  
254 terPlus package for consistent clustering in TCGA-SKCM dataset based on the 125  
255 prognostic genes and identified two clusters: Cluster 1 (319 cases) and Cluster 2 (148  
256 cases) (Figure 1C and Figure S1E, S1F). Principal component analysis also suggested  
257 that these two populations were distinct groups (Figure S1G). Cluster 1 had worse OS  
258 outcomes than Cluster 2 (log-rank  $p = 0.0071$ , Figure 1D).

259

### 260 *Functional and multi-omics analyses*

261 To demonstrate signaling pathway activation in each cluster, we calculated the GSVA  
262 enrichment scores using Kyoto Encyclopedia of Genes and Genomes (KEGG) signal-  
263 ing pathway gene sets in MSigDB v7.4. Figure 2A depicts the top 20 enriched pathways  
264 in each cluster. In comparison with Cluster 2, Cluster 1 was characterized by the lack

265 of immune-related pathways, such as T cell receptor signaling pathways. A previous  
266 study divided TCGA-SKCM tumors into three subtypes<sup>1</sup>: (1) immune, (2) keratin, and  
267 (3) MITF-low. We found that Cluster 1 contained a higher proportion of the keratin  
268 subtype (57% vs. 13%) and a lower proportion of the immune subtype (34.7% vs.  
269 56.2%) than Cluster 2 (Figure 2B).

270 GSEA indicated that the M2 macrophage pathway was enriched in Cluster 1  
271 (Figure 2C). Examination of the differential expression of immune checkpoint genes  
272 revealed that Cluster 2 demonstrated higher immune checkpoint-related gene expres-  
273 sion compared with Cluster 1 (Figure 2D). To investigate mutations in each cluster, we  
274 highlighted the top 20 significantly mutated genes (SMGs) in the two clusters with a  
275 waterfall plot (Figure 3A, 3B). The two clusters shared most of the SMGs. However,  
276 Cluster 1 contained unique SMGs, including *XIRP2* (31%), *FAT4* (31%), *USH2A* (30%),  
277 and *ANK3* (29%) while Cluster 2 contained unique SMGs that included *FLG* (40%),  
278 *APOB* (40%), and *CSMD2* (37%).

279 A recent prospective study found that higher tumor mutation burden (TMB) is  
280 associated with better immunotherapy response<sup>4</sup>. Cluster 2 samples demonstrated  
281 higher TMB severity than Cluster 1 samples (Figure S2A). We used GISTIC 2.0 to  
282 analyze the somatic copy number variation (SCNV) and summarized the amplified and  
283 deleted areas of Cluster 1 and Cluster 2. Cluster 1 contained a total of 56 focal deletion  
284 peaks and 69 focal amplification peaks, while Cluster 2 contained 37 focal deletion  
285 peaks and 28 focal amplification peaks (Figure 4A, 4B). Examination of the frequency  
286 of immune checkpoint gene amplification or deletion in each subtype revealed that

287 Cluster 2 contained more amplification of immune checkpoint (*VTCN1*, *TNFRSF* fam-  
288 ily) and effector T cell function genes (*GZMK*, *GZMA*, *IFNG*) while Cluster 1 had more  
289 deletions (*VTCN1*, *ADORA2A*, *TJP1*, *IDO1*, *HAVCR2*) (Figure 4A, 4B). We used the R  
290 ChAMP package<sup>57</sup> with FDR < 0.05 to analyze the methylation differences in the two  
291 clusters and obtained 28,870 differentially methylated probes (DMPs) between Cluster  
292 1 and Cluster 2. Interestingly, *CD8A* and *HAVCR2* of Cluster 1 had increased methyla-  
293 tion levels than that in Cluster 2 (Figure 4C).

294

#### 295 *Construction of the M2 macrophage cluster-related prognostic model*

296 We explored the DEGs between the two clusters to construct a prognostic model (Figure  
297 5A). First, we performed univariate Cox analysis on the DEGs and obtained 3390 genes  
298 with prognostic significance. Then, we performed lasso regression and multivariate  
299 Cox analysis based on the 3390 genes to construct a prognostic model in TCGA-SKCM  
300 dataset (Figure S2B, S2C). The risk score was calculated as follows:  $0.323 \times \text{ATP13A5}$   
301  $+ 0.465 \times \text{C1orf105} + 0.195 \times \text{TM6SF2} + 0.151 \times \text{HEYL} + 0.146 \times \text{PTK6} + 0.065 \times \text{KIT} +$   
302  $0.049 \times \text{ENTHD1} - 0.209 \times \text{SLC18A1} - 0.201 \times \text{ZMAT1} - 0.158 \times \text{CD14}$ . Then, TCGA-  
303 SKCM patients were divided into high- and low-risk groups based on their risk scores.  
304 Patients with higher risk scores had worse OS prognosis, and Cluster 1 patients had  
305 higher risk scores (Figure 5B, 5C).

306 Time-dependent AUC and the AUCs at 1 (0.70), 2 (0.74), 3 (0.72), and 5 (0.74)  
307 years suggested that the M2 macrophage cluster-related risk score had potential value  
308 for predicting the OS of patients with melanoma in TCGA datasets (Figure 5D and

309 Figure S2D). To verify the prognostic significance of the model, we used the same  
310 model score threshold to calculate the risk score in a validation cohort (GSE65904),  
311 which yielded a similar result, where patients with higher risk scores had worse OS,  
312 and the risk score had prognostic value (Figure 5E, 5F and Figure S2E). The risk score  
313 was identified as an independent prognostic factor in both TCGA and GSE65904 da-  
314 taset (Table S1).

315

316 *Differences in immune cell infiltration and immune gene expression between high- and*  
317 *low-risk groups*

318 The risk score played an important role in melanoma progression. To assess the  
319 influence of the M2 macrophage cluster-related risk score on the tumor microenviron-  
320 ment (TME), we compared the immune cell infiltration between the high and low score  
321 groups. Patients with high risk scores had increased M2 macrophage infiltration and  
322 decreased CD8 T cell infiltration compared to patients with low risk scores (Figure 5G).  
323 We also explored differences in the expression of *HLA* family genes and immune check-  
324 point markers in the high and low risk score groups in TCGA and GEO datasets. The  
325 high risk score group had significantly increased expression of the antigen-presentation  
326 and immune checkpoint-related genes in comparison to the low risk score group of  
327 TCGA datasets (Figure 6A–C). Consistent with these results, analysis of GSE65904  
328 sample data yielded similar results (Figure S3A–C). **Furthermore, we applied our M2**  
329 **macrophage cluster-related model to the merged datasets (GSE78220 and GSE91061)**  
330 **with available immunotherapy outcomes and examined the risk score of melanoma**

331 patients. To further observe the different response to immunotherapy in high risk score  
332 and low risk score groups, we found that patients with high risk score had higher pro-  
333 portion of non-responders to immunotherapy compared to patients with low risk score  
334 (64% vs 28%). (Figure 6D)

335

336 *VARSI* as a hub gene of the yellow module and its role in melanoma progression and  
337 macrophage polarization

338 We explored the hub genes in the yellow module. We used the 275 genes in the yellow  
339 module to construct a PPI network based on the STRING database results. Then, the  
340 top hub genes were determined via the Closeness, Stress, and Radiality algorithms in  
341 the Cytoscape cytoHubba plugin (Figure S4). The hub gene essential for melanoma cell  
342 growth was determined with DepMap (<https://depmap.org/portal/download/>), a  
343 CRISPR-based database for genome-wide loss-of-function screening. Only *VARSI* was  
344 identified by intersecting the gene sets obtained from these four methods (Figure 7A).  
345 In TCGA dataset, high *VARSI* expression correlated with shorter OS (Figure 7B). Fur-  
346 thermore, we explored which cell type mainly expressed *VARSI* in melanoma. The  
347 result of single-cell RNA-seq of the GSE115978 dataset demonstrated that *VARSI* was  
348 expressed predominantly in tumor cells but not in stromal and immune cells (Figure  
349 7C). Additionally, high risk score patients had higher *VARSI* expression levels than low  
350 risk score patients (Figure S5A).

351 We also examined whether *VARSI* played an important role in melanoma pro-  
352 gression and constructed *VARSI*-overexpressing and *VARSI* knockdown A375 and SK-



353 MEL-28 cell lines (Figure S5B). *VARSI* overexpression promoted the migration and  
354 invasive ability of the cells while *VARSI* suppression significantly decreased it (Figure  
355 7D–F). GSEA indicated that high *VARSI* levels positively correlated with the metasta-  
356 sis-related pathway in TCGA-SKCM dataset (Figure 7G). Furthermore, a search of the  
357 Human Protein Atlas (HPA) database<sup>58,59</sup> showed that *VARSI* expression was increased  
358 in primary melanoma compared to normal skin tissue, and further increased in meta-  
359 static melanoma (Figure S5D).

360

361 *VARSI* negatively correlated with immune infiltration and induced M2 macrophage po-  
362 larization

363 To investigate the *VARSI*-related pathways, we divided TCGA-SKCM dataset patients  
364 into two groups based on the median *VARSI* gene expression. GSVA of the KEGG  
365 pathways revealed that the immune-related pathways, such as the T cell receptor path-  
366 way, were enriched in patients with low *VARSI* expression, while tumor growth path-  
367 ways such as the cell cycle pathway and the mTOR pathway were enriched in patients  
368 with high *VARSI* expression (Figure 8A).

369 We examined the correlation between *VARSI* expression and the CIBERSORT  
370 immune cell infiltration score. *VARSI* expression positively correlated with intra-  
371 tumoral M2 macrophage infiltration and negatively correlated with M1 macrophage  
372 and CD8 T cell infiltration (Figure 8B, 8C). To elucidate the role of *VARSI* in M2  
373 macrophage polarization, THP1 cells were treated with the supernatant of A375 cells  
374 line overexpressing *VARSI* (*VARSI*-A375) and A375 vector (vector-A375) cell lines

375 and detected the M1 and M2 macrophage markers. Flow cytometry revealed a 3-fold  
376 increase in the expression of the M2 macrophage marker CD206 in THP1 cells treated  
377 with VARS1-A375 supernatants compared with those treated with vector-A375-super-  
378 natants, while the expression of CD86, **an M1 macrophage marker, decreased by 15.2%**  
379 (Figure 8D). Taken together, these results indicate that VARS1 may play important roles  
380 in M2 macrophage infiltration and polarization.

381

382 *High VARS1 expression correlated with low CD8 T cell infiltration and predicted the*  
383 *poor clinical benefit of immune checkpoint blockade*

384 High *VARS1* expression correlated negatively with CD8 T cell infiltration in TCGA-  
385 SKCM dataset (Figure 9A). The expression of many immune checkpoint genes was  
386 negatively associated with *VARS1* expression in both TCGA and GSE65904 datasets  
387 (Figure 9B and **Figure S6A**). Previous studies have shown that TGF- $\beta$ 1 is involved in  
388 PD-1 immunotherapy resistance and M2 macrophage polarization<sup>11, 66</sup>. Here, the en-  
389 zyme-linked immunosorbent assay demonstrated that the supernatant of VARS1-over-  
390 expressing cells had significantly increased TGF- $\beta$ 1 concentrations compared to that of  
391 vector cells (Figure S5C). We performed SubMap analysis to assess the anti-PD-1 im-  
392 munotherapy response in high- and low-*VARS1* expression patients with melanoma.  
393 The results demonstrated that low *VARS1* expression predicted partial response (PR) to  
394 anti-PD-1 immunotherapy whereas high *VARS1* expression predicted resistance (SD)  
395 to anti-PD-1 immunotherapy (Figure 9C). To explore the suppressive role of VARS1 in  
396 immune regulation, we used different algorithms to investigate the correlation between

397 *VARSI* gene expression and CD8 T cell infiltration in Pan-TCGA datasets. The heatmap  
398 showed that *VARSI* gene expression and CD8 T cell infiltration were inversely corre-  
399 lated in most cancers (Figure 9D).

400 GSEA indicated that many immune-related pathways, such as the T cell-medi-  
401 ated cytotoxicity pathway, were enriched in the patients with high *VARSI* expression in  
402 70% of cancer types (Figure 9E). Finally, we evaluated the association between *VARSI*  
403 and OS across 33 cancer types. High *VARSI* expression was correlated with poorer  
404 survival in six cancer types (Figure S6B), including KICH (hazard ratio [HR] = 2.80),  
405 MESO (HR = 1.74), SKCM (HR = 1.32), SARC (HR = 2.25), LAML (HR = 1.69), and  
406 CESC (HR = 1.49) and with better survival in READ (HR = 0.47). These results suggest  
407 that *VARSI* may have predictive value for patient prognosis and PD-1 immunotherapy  
408 efficacy.

409

## 410 **Discussion**

411 Melanoma has been recognized as the most aggressive type of skin cancer and is par-  
412 ticularly responsive to immunotherapy such as immune checkpoint blockade with  
413 CTLA4 and PD-1 antagonists<sup>38</sup>. Immunotherapy can improve patient outcomes obvi-  
414 ously, especially for patients with stage IV melanoma, but the mortality rates would  
415 become quite high once patients develop immunotherapy resistance<sup>2, 53, 54</sup>. Nevertheless,  
416 the goal of addressing and predicting immunotherapy response in melanoma has been  
417 reached. Considering that numerous studies have demonstrated the importance of  
418 TAMs in clinical outcome and immunotherapy resistance in melanoma, we applied

419 WGCNA to identify a M2-like TAM module in melanoma for the first time and examine  
420 the reliability of M2-like TAMs as a prognostic marker in melanoma and in predicting  
421 immunotherapy response.

422         Recent studies have demonstrated the prognostic importance of TAMs in vari-  
423 ous cancers. The presence of TAMs, mainly M2-like TAMs, is not only correlated with  
424 poor outcome in various tumors, but is also associated with the generation of an immu-  
425 nosuppressive TME<sup>16, 22, 46</sup>. As an important source of inflammatory cytokines and  
426 growth factors, M2-like TAMs support angiogenesis, which results in the promotion of  
427 tumor cell proliferation and survival<sup>9, 21, 51</sup>. A previous study reported that TAM-derived  
428 VEGFA enhanced vascular permeability, thereby facilitating cancer cell intravasation  
429 and metastasis<sup>19</sup>. Moreover, M2-like TAMs express PD-L1, a major negative regulatory  
430 ligand suppressing cytotoxic T lymphocyte (CTL) activation in the TME. In some can-  
431 cers, M2-like TAM-derived PD-L1 is more effective than cancer cell-derived PD-L1  
432 for suppressing CTL function<sup>27, 50</sup>. Recent studies have demonstrated that M2-like  
433 TAM-derived factors, such as interleukin (IL)-6, IL-10, and milk fat globule-epidermal  
434 growth factor VIII (MFG-E8), can suppress naïve T cell proliferation, promote car-  
435 boplatin resistance, and enhance tumor growth<sup>23, 39, 61</sup>. Furthermore, depleting or down-  
436 regulating M2-TAMs suppressed tumor growth by inactivating CCL2 and/or CCR2 sig-  
437 naling<sup>55</sup>. However, a M2-like TAM-related prognostic model in melanoma has not been  
438 explored.

439         Based on the importance of M2-like TAMs to clinical outcome and the immu-  
440 nosuppressive TME, we inferred that a gene module associated with M2-like TAMs in

441 melanoma could be applied to establish a prognostic model that could provide predic-  
442 tive value in clinical outcome and immunotherapy response in melanoma. We first val-  
443 idated that the high score of M2-like macrophages is significantly associated with  
444 poorer survival in TCGA and GSE98394 datasets. To examine the reliability of M2-like  
445 TAMs as a prognostic marker in melanoma, two clusters were grouped by genes in a  
446 M2-like TAM-related module and demonstrated different OS and clinical features.

447         With poorer OS, Cluster 1 was characterized by enrichment of the M2 macro-  
448 phage pathway and the lack of immune response pathways, such as the T cell receptor  
449 signaling pathway, complement and coagulation cascades, and leukocyte transendothe-  
450 lial migration. The activation of these immune response pathways is associated with  
451 good immunotherapy response and good clinical outcome<sup>10, 15, 18, 54</sup>, indicating that the  
452 lack of immune response pathways was one of the major leading causes of the poorer  
453 outcome in Cluster 1 as compared with Cluster 2. Furthermore, the transcriptomic clas-  
454 sification of melanoma includes the immune, keratin, and MITF-low subtypes. Com-  
455 pared with Cluster 2, Cluster 1 had a lower proportion of immune-subtype melanoma,  
456 which is associated with overexpression of the immune-related genes and more favor-  
457 able post-accession survival. Moreover, Cluster 1 also contained a higher proportion of  
458 the keratin subtype, which exhibits worse outcome when compared with the immune  
459 and MITF-low subtypes.

460         As an emerging predictive biomarker of cancer immunotherapy, elevated TMB  
461 can be associated with increased clinical benefit from immune checkpoint blockade  
462 therapies<sup>4</sup>. Interestingly, Cluster 2 had higher TMB severity than Cluster 1. Recent

463 studies have also shown that checkpoint blockade immunotherapy response is corre-  
464 lated with the immune checkpoint gene and ligand receptor expression level<sup>45</sup>. Cluster  
465 2 had more amplifications of the immune checkpoint and effector T cell function genes,  
466 while Cluster 1 had more deletions of the genes. This indicated that Cluster 1 had more  
467 decreased benefit from immunotherapy compared to Cluster 2. Our results suggest that  
468 the identified M2-like TAM module is reliable for providing meaningful prognostic  
469 value in the clinical outcome and immunotherapy response in melanoma.

470 We further identified a M2 macrophage cluster-related prognostic model and  
471 generated a prognostic risk score based on the DEGs between the M2-like TAM-related  
472 clusters. In TCGA cohort, Cluster 1 had a significantly higher risk score than Cluster 2,  
473 and OS was significantly decreased in the high risk score group compared to the low  
474 risk score group. Moreover, a higher risk score was associated with a series of tumor  
475 immunogenic factors. In our study, the high risk score group demonstrated less CD8+  
476 T cell infiltration and more M2 macrophage infiltration compared to the low risk score  
477 group. Previous studies have proven that inhibiting antigen presentation is associated  
478 with immune evasion. The antitumor immune response is mainly centered on antigen  
479 presentation. Our result demonstrated that the high risk score group had significantly  
480 suppressed antigen presentation compared to the low risk score group, indicating that a  
481 higher risk score was associated with lower immunotherapy response. Furthermore, our  
482 findings also demonstrate that compared with the low risk score group, the high risk  
483 score group had decreased expression of the immune checkpoint genes and the majority  
484 of ligand receptors, including CCL5, CXCL9, and IFNG. This observation prompted

485 us to examine the prognostic value of this risk score in immunotherapy outcomes: there  
486 was a higher percentage of SD/progressive disease in high-risk patients than in low-risk  
487 patients. Hence, the risk score based on the M2-like TAM-related prognostic model  
488 represented an independent prognosticator of OS and immunotherapy response in mel-  
489 anoma.

490 With the aim of identifying a potential biomarker for predicting OS and immu-  
491 notherapy response in melanoma, we identified the top hub genes in the specific M2-  
492 like TAM module via three different algorithms. Interestingly, only *VARSI* was identi-  
493 fied after intersection between these hub genes and the melanoma cell growth-related  
494 genes in the DepMap database, indicating that *VARSI* was associated with M2-like  
495 TAM polarization and melanoma tumor cell growth. Moreover, our results showed that  
496 *VARSI* was mainly expressed by tumor cells and that high *VARSI* expression was sig-  
497 nificantly associated with poor OS and the metastasis-related pathway in TCGA-SKCM  
498 dataset. As an ARS member, *VARSI* plays an important role in protein synthesis. Re-  
499 cent studies have shown that ARSs are involved in various physiological and patholog-  
500 ical processes, especially tumorigenesis, and could be potential biomarkers and thera-  
501 peutic targets in cancer treatment<sup>25</sup>. However, only one study reported that *VARSI*-  
502 bearing extracellular vesicles were associated with worse clinical outcome in mela-  
503 noma<sup>60</sup>. The role of *VARSI* in melanoma remains unclear, which prompted our explo-  
504 ration of the function of *VARSI* as a potential prognostic biomarker in melanoma.

505 Our *in vitro* experiments demonstrated that A375 and SK-MEL-28 cell migra-  
506 tion and invasive ability was significantly increased after *VARSI* was overexpressed,

507 while *VARS1* knockdown decreased it. Moreover, high *VARS1* expression was associ-  
508 ated with low immune-related signaling pathway enrichment, low immune checkpoint  
509 expression, and low CD8 T cell infiltration and predicted anti-PD-1 immunotherapy  
510 resistance, which indicated that the upregulation of *VARS1* can be associated with low  
511 immunotherapy response and poor clinical outcome in melanoma. Previous studies  
512 have also shown that the tumor-suppressing effect of the TGF- $\beta$ 1 signaling pathway has  
513 an essential function in poor immunotherapy response<sup>11</sup>. Our *in vitro* experiments  
514 demonstrated that *VARS1* upregulated TGF- $\beta$ 1 expression in tumor cells and the M2  
515 macrophage marker CD206. In addition, our analysis of the Pan-TCGA datasets sup-  
516 ported the idea that high *VARS1* expression was correlated with poor CD8 T cell infil-  
517 tration in most cancers. Taken together, our results suggest that, as the hub gene related  
518 to the M2-like macrophage module, *VARS1* exerts an immunosuppressive effect on mel-  
519 anoma progression and is a potential predictive biomarker of clinical outcome and im-  
520 munotherapy response in melanoma, which requires further investigation in prospective  
521 studies and larger populations.

522 Our study has potential weaknesses. It is a retrospective study and requires a  
523 multi-center cohort study to validate the predictive value of this M2-like TAM-related  
524 prognostic model and *VARS1* as a predictive biomarker of anti-PD-1 immunotherapy  
525 response in melanoma. In addition, further animal experiments are necessary for ex-  
526 ploring the functional role of *VARS1* in melanoma, which can help provide more robust  
527 clues to guide clinical application.

528



529 **Conclusion**

530 Our studies identified a M2-like TAM-related prognostic model for predicting OS and  
531 immunotherapy resistance in melanoma and explored the potential predictive value of  
532 *VARS1* in melanoma immunotherapy. We hope that our research widens the current un-  
533 derstanding of the role of M2-like TAMs in the biology of melanoma and prognosis  
534 prediction and that *VARS1* can be a novel predictive biomarker of clinical outcome and  
535 immunotherapy response in melanoma.

536

537 **Abbreviations**

538 ARSs: aminoacyl-tRNA synthetases; AUC: area under the curve; CNA: copy number  
539 alteration; CTL: cytotoxic T lymphocyte; DEGs: differentially expressed genes;  
540 DMEM: Dulbecco's modified Eagle's medium; DMPs: differentially methylated  
541 probes; FACS: fluorescence-activated cell sorting; FBS: fetal bovine serum; FDR: false  
542 discovery rate; FPKM: fragments per kilobase transcript per million fragments; GDC:  
543 Genomic Data Commons; GEO: Gene Expression Omnibus; GSEA: gene set enrich-  
544 ment analysis; GSVA: gene set variation analysis; HR: hazard ratio; IL: interleukin;  
545 KEGG: Kyoto Encyclopedia of Genes and Genomes; lasso: least absolute shrinkage  
546 and selection operator; MFG-E8: milk fat globule-epidermal growth factor VIII;  
547 MSigDB: Molecular Signatures Database; OS: overall survival; PBS: phosphate-buff-  
548 ered saline; PMA: phorbol-12-myristate-13-acetate; PPI: protein-protein interaction;  
549 qRT-PCR: quantitative real-time PCR; RNA-seq: RNA sequencing; SCNv: somatic  
550 copy number variation; siRNA: small interfering RNA; SKCM: skin cutaneous

551 melanoma; SMG: significantly mutated genes; TAMs: tumor-associated macrophages;  
552 TCGA: The Cancer Genome Atlas; TMB: tumor mutation burden; TME: tumor micro-  
553 environment; TPM: transcripts per million; WGCNA: weighted gene co-expression  
554 network analysis; MESO: Mesothelioma; KICH: Kidney Chromophobe; SARC: Sar-  
555 coma; LAML: Acute Myeloid Leukemia; CESC: Cervical squamous cell carcinoma  
556 and endocervical adenocarcinoma; READ: Rectum adenocarcinoma.

557

### 558 **Acknowledgements**

559 We are grateful to Jiacheng Lou (Dalian, China), Shipeng Guo (Chongqing, China) and  
560 Peng Luo (Guangzhou, China) for their help on the bioinformatic part of this study. We  
561 thank Anastasia Gaculenko (Erlangen, Germany), Christine Zech (Erlangen, Germany),  
562 Bojan Smiljanov (Munich, Germany), Joshua Luft (Munich, Germany) for providing  
563 help with technical support.

564

### 565 **Authors' contributions**

566 ZW, KL, and ES designed the study. ZW and ES wrote the manuscript. KL and HL  
567 performed the in vitro. JH supervised the study and edited the manuscript. All authors  
568 contributed to the article and approved the submitted version.

569

### 570 **Funding**

571 This work was supported by Medical Scientific Research Foundation of Guangdong  
572 Province of China (C2017033); the China Scholarship Council (CSC202006380042,

573 CSC202108080048).

574

575 **Availability of data and materials**

576 All the data corresponding to the DLBCL series used in this study are available

577 in GEO (<https://www.ncbi.nlm.nih.gov/geo>) and TCGA ([https://portal.gdc.](https://portal.gdc.cancer.gov/)

578 cancer.gov/), which are public functional genomics data repositories.

579

580 **Declarations**

581 **Ethics approval and consent to participate**

582 Not applicable.

583

584 **Consent for publication**

585 Not applicable.

586

587 **Competing interests**

588 The authors declare no conflicts of interest.

589

590 **References**

591 1 Genomic Classification of Cutaneous Melanoma. Cell 2015; 161: 1681-1696.

592

593 2 Carlino MS, Larkin J, Long GV. Immune checkpoint inhibitors in melanoma. The Lancet  
594 2021; 398: 1002-1014.

595

596 3 Cassetta L, Pollard JW. Targeting macrophages: therapeutic approaches in cancer. Nature  
597 reviews Drug discovery 2018; 17: 887-904.

598

599 4 Chan TA, Yarchoan M, Jaffee E, Swanton C, Quezada SA, Stenzinger A *et al.* Development  
600 of tumor mutation burden as an immunotherapy biomarker: utility for the oncology clinic.  
601 *Annals of oncology : official journal of the European Society for Medical Oncology* 2019;  
602 30: 44-56.  
603

604 5 Chen J, Yao Y, Gong C, Yu F, Su S, Chen J *et al.* CCL18 from tumor-associated  
605 macrophages promotes breast cancer metastasis via PITPNM3. *Cancer Cell* 2011; 19: 541-  
606 555.  
607

608 6 Chin CH, Chen SH, Wu HH, Ho CW, Ko MT, Lin CY. cytoHubba: identifying hub objects  
609 and sub-networks from complex interactome. *BMC Syst Biol* 2014; 8 Suppl 4: S11.  
610

611 7 Colaprico A, Silva TC, Olsen C, Garofano L, Cava C, Garolini D *et al.* TCGAbiolinks: an  
612 R/Bioconductor package for integrative analysis of TCGA data. *Nucleic acids research*  
613 2016; 44: e71-e71.  
614

615 8 Davis S, Meltzer PS. GEOquery: a bridge between the Gene Expression Omnibus (GEO)  
616 and BioConductor. *Bioinformatics* 2007; 23: 1846-1847.  
617

618 9 De Palma M, Biziato D, Petrova TV. Microenvironmental regulation of tumour  
619 angiogenesis. *Nature reviews Cancer* 2017; 17: 457-474.  
620

621 10 Dendrou CA, Petersen J, Rossjohn J, Fugger L. HLA variation and disease. *Nature reviews*  
622 *Immunology* 2018; 18: 325-339.  
623

624 11 Derynck R, Turley SJ, Akhurst RJ. TGF $\beta$  biology in cancer progression and immunotherapy.  
625 *Nature reviews Clinical oncology* 2021; 18: 9-34.  
626

627 12 Falleni M, Savi F, Tosi D, Agape E, Cerri A, Moneghini L *et al.* M1 and M2 macrophages'  
628 clinicopathological significance in cutaneous melanoma. *Melanoma Res* 2017; 27: 200-  
629 210.  
630

631 13 Friedman J, Hastie T, Tibshirani R. Regularization paths for generalized linear models via  
632 coordinate descent. *Journal of statistical software* 2010; 33: 1.  
633

634 14 Friedman J, Smith DE, Issa MY, Stanley V, Wang R, Mendes MI *et al.* Biallelic mutations in  
635 valyl-tRNA synthetase gene VARS are associated with a progressive neurodevelopmental  
636 epileptic encephalopathy. *Nat Commun* 2019; 10: 707.  
637

638 15 Gibney GT, Weiner LM, Atkins MB. Predictive biomarkers for checkpoint inhibitor-based  
639 immunotherapy. *Lancet Oncol* 2016; 17: e542-e551.  
640

641 16 Gordon SR, Maute RL, Dulken BW, Hutter G, George BM, McCracken MN *et al.* PD-1  
642 expression by tumour-associated macrophages inhibits phagocytosis and tumour

643 immunity. *Nature* 2017; 545: 495-499.  
644

645 17 Graney P, Ben-Shaul S, Landau S, Bajpai A, Singh B, Eager J *et al.* Macrophages of diverse  
646 phenotypes drive vascularization of engineered tissues. *Science advances* 2020; 6:  
647 eaay6391.  
648

649 18 Guglietta S, Rescigno M. Hypercoagulation and complement: Connected players in tumor  
650 development and metastases. *Seminars in immunology* 2016; 28: 578-586.  
651

652 19 Guo L, Akahori H, Harari E, Smith SL, Polavarapu R, Karmali V *et al.* CD163+ macrophages  
653 promote angiogenesis and vascular permeability accompanied by inflammation in  
654 atherosclerosis. *J Clin Invest* 2018; 128: 1106-1124.  
655

656 20 Hänzelmann S, Castelo R, Guinney J. GSVA: gene set variation analysis for microarray and  
657 RNA-seq data. *BMC bioinformatics* 2013; 14: 1-15.  
658

659 21 Hara T, Chanoch-Myers R, Mathewson ND, Myskiw C, Atta L, Bussema L *et al.* Interactions  
660 between cancer cells and immune cells drive transitions to mesenchymal-like states in  
661 glioblastoma. *Cancer Cell* 2021; 39: 779-792.e711.  
662

663 22 Jensen TO, Schmidt H, Møller HJ, Høyer M, Maniecki MB, Sjoegren P *et al.* Macrophage  
664 markers in serum and tumor have prognostic impact in American Joint Committee on  
665 Cancer stage I/II melanoma. *Journal of clinical oncology : official journal of the American*  
666 *Society of Clinical Oncology* 2009; 27: 3330-3337.  
667

668 23 Jinushi M, Chiba S, Yoshiyama H, Masutomi K, Kinoshita I, Dosaka-Akita H *et al.* Tumor-  
669 associated macrophages regulate tumorigenicity and anticancer drug responses of cancer  
670 stem/initiating cells. *Proceedings of the National Academy of Sciences of the United*  
671 *States of America* 2011; 108: 12425-12430.  
672

673 24 Kalbasi A, Ribas A. Tumour-intrinsic resistance to immune checkpoint blockade. *Nature*  
674 *reviews Immunology* 2020; 20: 25-39.  
675

676 25 Kim S, You S, Hwang D. Aminoacyl-tRNA synthetases and tumorigenesis: more than  
677 housekeeping. *Nature reviews Cancer* 2011; 11: 708-718.  
678

679 26 Kortylewski M, Xin H, Kujawski M, Lee H, Liu Y, Harris T *et al.* Regulation of the IL-23 and  
680 IL-12 balance by Stat3 signaling in the tumor microenvironment. *Cancer Cell* 2009; 15:  
681 114-123.  
682

683 27 Kuang DM, Zhao Q, Peng C, Xu J, Zhang JP, Wu C *et al.* Activated monocytes in  
684 peritumoral stroma of hepatocellular carcinoma foster immune privilege and disease  
685 progression through PD-L1. *The Journal of experimental medicine* 2009; 206: 1327-1337.  
686

687 28 Kwon NH, Fox PL, Kim S. Aminoacyl-tRNA synthetases as therapeutic targets. Nature  
688 reviews Drug discovery 2019; 18: 629-650.  
689

690 29 Langfelder P, Horvath S. WGCNA: an R package for weighted correlation network analysis.  
691 BMC bioinformatics 2008; 9: 1-13.  
692

693 30 Larkin JE, Frank BC, Gavras H, Sultana R, Quackenbush J. Independence and reproducibility  
694 across microarray platforms. Nat Methods 2005; 2: 337-344.  
695

696 31 Leek JT, Johnson WE, Parker HS, Jaffe AE, Storey JD. The sva package for removing batch  
697 effects and other unwanted variation in high-throughput experiments. Bioinformatics  
698 2012; 28: 882-883.  
699

700 32 Locati M, Curtale G, Mantovani A. Diversity, Mechanisms, and Significance of Macrophage  
701 Plasticity. Annual review of pathology 2020; 15: 123-147.  
702

703 33 Loeuillard E, Yang J, Buckarma E, Wang J, Liu Y, Conboy C *et al.* Targeting tumor-  
704 associated macrophages and granulocytic myeloid-derived suppressor cells augments  
705 PD-1 blockade in cholangiocarcinoma. J Clin Invest 2020; 130: 5380-5396.  
706

707 34 López-Janeiro Á, Padilla-Ansala C, de Andrea CE, Hardisson D, Melero I. Prognostic value  
708 of macrophage polarization markers in epithelial neoplasms and melanoma. A systematic  
709 review and meta-analysis. Modern pathology : an official journal of the United States and  
710 Canadian Academy of Pathology, Inc 2020; 33: 1458-1465.  
711

712 35 Lorent M, Giral M, Foucher Y. Net time-dependent ROC curves: a solution for evaluating  
713 the accuracy of a marker to predict disease-related mortality. Statistics in medicine 2014;  
714 33: 2379-2389.  
715

716 36 Love MI, Huber W, Anders S. Moderated estimation of fold change and dispersion for  
717 RNA-seq data with DESeq2. Genome biology 2014; 15: 1-21.  
718

719 37 Lu C-S, Shiau A-L, Su B-H, Hsu T-S, Wang C-T, Su Y-C *et al.* Oct4 promotes M2  
720 macrophage polarization through upregulation of macrophage colony-stimulating factor  
721 in lung cancer. Journal of hematology & oncology 2020; 13: 1-16.  
722

723 38 Luke JJ, Flaherty KT, Ribas A, Long GV. Targeted agents and immunotherapies: optimizing  
724 outcomes in melanoma. Nature reviews Clinical oncology 2017; 14: 463-482.  
725

726 39 Maimon A, Levi-Yahid V, Ben-Meir K, Halpern A, Talmi Z, Priya S *et al.* Myeloid cell-  
727 derived PROS1 inhibits tumor metastasis by regulating inflammatory and immune  
728 responses via IL-10. J Clin Invest 2021; 131.  
729

730 40 Mantovani A, Marchesi F, Malesci A, Laghi L, Allavena P. Tumour-associated macrophages

731 as treatment targets in oncology. *Nature reviews Clinical oncology* 2017; 14: 399-416.  
732

733 41 Mayakonda A, Lin D-C, Assenov Y, Plass C, Koeffler HP. Maftools: efficient and  
734 comprehensive analysis of somatic variants in cancer. *Genome research* 2018; 28: 1747-  
735 1756.  
736

737 42 Mermel CH, Schumacher SE, Hill B, Meyerson ML, Beroukhir R, Getz G. GISTIC2.0  
738 facilitates sensitive and confident localization of the targets of focal somatic copy-number  
739 alteration in human cancers. *Genome Biol* 2011; 12: R41.  
740

741 43 Miller KD, Nogueira L, Mariotto AB, Rowland JH, Yabroff KR, Alfano CM *et al.* Cancer  
742 treatment and survivorship statistics, 2019. *CA: a cancer journal for clinicians* 2019; 69:  
743 363-385.  
744

745 44 Miller KD, Fidler-Benaoudia M, Keegan TH, Hipp HS, Jemal A, Siegel RL. Cancer statistics  
746 for adolescents and young adults, 2020. *CA: a cancer journal for clinicians* 2020; 70: 443-  
747 459.  
748

749 45 Morad G, Helmink BA, Sharma P, Wargo JA. Hallmarks of response, resistance, and toxicity  
750 to immune checkpoint blockade. *Cell* 2021; 184: 5309-5337.  
751

752 46 Muraoka D, Seo N, Hayashi T, Tahara Y, Fujii K, Tawara I *et al.* Antigen delivery targeted  
753 to tumor-associated macrophages overcomes tumor immune resistance. *J Clin Invest*  
754 2019; 129: 1278-1294.  
755

756 47 Newman AM, Liu CL, Green MR, Gentles AJ, Feng W, Xu Y *et al.* Robust enumeration of  
757 cell subsets from tissue expression profiles. *Nature methods* 2015; 12: 453-457.  
758

759 48 Noy R, Pollard JW. Tumor-associated macrophages: from mechanisms to therapy. *Immunity*  
760 2014; 41: 49-61.  
761

762 49 Pathria P, Louis TL, Varner JA. Targeting Tumor-Associated Macrophages in Cancer.  
763 *Trends in immunology* 2019; 40: 310-327.  
764

765 50 Pittet MJ, Michielin O, Migliorini D. Clinical relevance of tumour-associated macrophages.  
766 *Nature reviews Clinical oncology* 2022.  
767

768 51 Qian BZ, Li J, Zhang H, Kitamura T, Zhang J, Campion LR *et al.* CCL2 recruits inflammatory  
769 monocytes to facilitate breast-tumour metastasis. *Nature* 2011; 475: 222-225.  
770

771 52 Rahal OM, Wolfe AR, Mandal PK, Larson R, Tin S, Jimenez C *et al.* Blocking interleukin (IL)  
772 4-and IL13-mediated phosphorylation of STAT6 (Tyr641) decreases M2 polarization of  
773 macrophages and protects against macrophage-mediated radioresistance of  
774 inflammatory breast cancer. *International Journal of Radiation Oncology\* Biology\* Physics*

775 2018; 100: 1034-1043.  
776  
777 53 Restifo NP, Smyth MJ, Snyder A. Acquired resistance to immunotherapy and future  
778 challenges. *Nature reviews Cancer* 2016; 16: 121-126.  
779  
780 54 Sharma P, Hu-Lieskovan S, Wargo JA, Ribas A. Primary, Adaptive, and Acquired Resistance  
781 to Cancer Immunotherapy. *Cell* 2017; 168: 707-723.  
782  
783 55 Shi L, Wang J, Ding N, Zhang Y, Zhu Y, Dong S *et al.* Inflammation induced by incomplete  
784 radiofrequency ablation accelerates tumor progression and hinders PD-1 immunotherapy.  
785 *Nat Commun* 2019; 10: 5421.  
786  
787 56 Therneau T. A package for survival analysis in R. R package version 3.1-12.)^(eds) Book A  
788 Package for Survival Analysis in R R package version 2020: 3.1-12.  
789  
790 57 Tian Y, Morris TJ, Webster AP, Yang Z, Beck S, Feber A *et al.* ChAMP: updated methylation  
791 analysis pipeline for Illumina BeadChips. *Bioinformatics* 2017; 33: 3982-3984.  
792  
793 58 Uhlen M, Zhang C, Lee S, Sjöstedt E, Fagerberg L, Bidkhori G *et al.* A pathology atlas of  
794 the human cancer transcriptome. *Science* 2017; 357: eaan2507.  
795  
796 59 Uhlén M, Fagerberg L, Hallström BM, Lindskog C, Oksvold P, Mardinoglu A *et al.* Tissue-  
797 based map of the human proteome. *Science* 2015; 347: 1260419.  
798  
799 60 Walbrecq G, Lecha O, Gaigneaux A, Fougeras MR, Philippidou D, Margue C *et al.* Hypoxia-  
800 Induced Adaptations of miRNomes and Proteomes in Melanoma Cells and Their Secreted  
801 Extracellular Vesicles. *Cancers* 2020; 12.  
802  
803 61 Wan S, Zhao E, Kryczek I, Vatan L, Sadovskaya A, Ludema G *et al.* Tumor-associated  
804 macrophages produce interleukin 6 and signal via STAT3 to promote expansion of human  
805 hepatocellular carcinoma stem cells. *Gastroenterology* 2014; 147: 1393-1404.  
806  
807 62 Wilkerson MD, Hayes DN. ConsensusClusterPlus: a class discovery tool with confidence  
808 assessments and item tracking. *Bioinformatics* 2010; 26: 1572-1573.  
809  
810 63 Wu Q, Allouch A, Paoletti A, Leteur C, Mirjolet C, Martins I *et al.* NOX2-dependent ATM  
811 kinase activation dictates pro-inflammatory macrophage phenotype and improves  
812 effectiveness to radiation therapy. *Cell Death & Differentiation* 2017; 24: 1632-1644.  
813  
814 64 Wu Z, Lei K, Xu S, He J, Shi E. Establishing a Prognostic Model Based on Ulceration and  
815 Immune Related Genes in Melanoma Patients and Identification of EIF3B as a Therapeutic  
816 Target. *Front Immunol* 2022; 13: 824946.  
817  
818 65 Yu G, Wang L-G, Han Y, He Q-Y. clusterProfiler: an R package for comparing biological



819 themes among gene clusters. *Omic*s: a journal of integrative biology 2012; 16: 284-287.

820

821 66 Yu X, Buttgereit A, Lelios I, Utz SG, Cansever D, Becher B *et al*. The Cytokine TGF- $\beta$   
822 Promotes the Development and Homeostasis of Alveolar Macrophages. *Immunity* 2017;  
823 47: 903-912.e904.

824

825

## 826 **Figures and legends**

827 **Figure 1 Identification of M2-like TAMs related cluster.** (A) Kaplan–Meier analysis  
828 showing the correlations between M2-like TAMs infiltration and overall survival (OS)

829 in TCGA SKCM cohorts. Patients were grouped into “high” or “low” groups based on

830 the median CIBERSORT-based M2 macrophages score. (B) Weighted correlation net-

831 work analysis (WGCNA) identifies M2-like TAMs and CD8 T cells infiltration corre-

832 lated modules. (C) Consensus clustering showed that 2 clusters were most stable. (D)

833 Kaplan-Meier survival analysis was performed to analyze the difference in overall sur-

834 vival (OS) of the two clusters.

835

836 **Figure 2 Functional analysis and differential expression analysis of two clusters.**

837 (A) The top 20 enriched KEGG pathways for each cluster were explored by GSVA

838 analysis. (B) Percentage of patients with different TCGA melanoma subtypes in differ-

839 ent clusters. (C) GSEA analysis showing that the correlation of clusters with M2 mac-

840 rophage gene sets. (D) The differences in expression of immune checkpoint-related

841 genes between the two clusters. ‘\*’ represents p-value  $\leq$  0.05, ‘\*\*’ represents p-

842 value  $\leq$  0.01, ‘\*\*\*’ represents p-value  $\leq$  0.001, N.S indicates not significant (p >

843 0.05).

844

845 **Figure 3 The mutation analysis of two clusters.** The waterfall plot showing the top  
846 20 genes with mutation frequency of Cluster 1 (A) and Cluster 2 (B). Each column  
847 represents an individual patient. The upper histogram is the total tumor mutation burden  
848 (TMB), and the numbers on the right are the mutation frequencies of each gene. The  
849 bar graph on the right is the proportion of each mutation type.

850

851 **Figure 4 multi-omics analysis of two clusters.** GISTIC 2.0 analysis determining the  
852 statistically significant amplifications and deletions in Cluster1 (A) and Cluster2 (B).  
853 Statistically significant gains (red) and losses (blue) of chromosomal locations are  
854 shown. The q-value, which characterize statistical significance, are shown below the  
855 graph. Areas with q-values < 0.25 (green lines) are considered significantly changed.  
856 These peak regions were annotated with known immune checkpoint related genes. (C)  
857 Volcano plots show alterations in DNA methylation that are statistically significant be-  
858 tween the two clusters. The right side shows different proportions of genomic features.

859

860 **Figure 5 Construction of the M2 macrophage cluster Related Prognostic Model.**

861 (A) Volcano plot showing differential expressed genes in two clusters. (B) The differ-  
862 ences in risk scores of prognostic models between two clusters. The difference in over-  
863 all survival between low-risk score and high-risk score groups in TCGA melanoma co-  
864 hort (C) and GSE65904 melanoma cohort (E). Patients were grouped into “high” or  
865 “low” groups based on the median risk score. Time-dependent areas under the curve

866 (AUC) values in TCGA (D) and GSE65904 (F). (G) The comparison of the immune  
867 cells infiltration between high-risk and low-risk groups.

868

869 **Figure 6 Differences in immune check point related gene and response to anti-PD-**  
870 **1 immunotherapy between high and low risk groups.** Boxplots displayed the differ-  
871 ences in the expression of antigen presentation (A), immune check point genes (B) and  
872 several ligand-receptor (C) in TCGA melanoma cohort. ‘\*’ represents p-value  $\leq 0.05$ ,  
873 ‘\*\*’ represents p-value  $\leq 0.01$ , ‘\*\*\*’ represents p-value  $\leq 0.001$ , N.S indicates not  
874 significant ( $p > 0.05$ ). (D) The proportion of patients with response to anti-PD-1 immu-  
875 notherapy in different risk group. SD: stable disease; PD: progressive disease; CR: com-  
876 plete response; PR: partial response.

877

878 **Figure 7 VARS1 as a Hub Gene and its Role in Melanoma progression.** (A) Venn  
879 diagram showing the intersection of hub genes of the M2 infiltration-related module  
880 and genes critical for the growth of melanoma human cell lines in the DepMap database.  
881 (B) Overall survival of TCGA melanoma patients with high and low VARS1 expression  
882 measured by Kaplan–Meier analysis. **Patients were grouped into “high” or “low”**  
883 **groups based on the median expression of VARS1.** (C) Analysis of VARS1 expression  
884 in various cell types in single-cell sequencing datasets. (D-F) Overexpressing VARS1  
885 promoted migration and invasion abilities in SK-MEL-28 cells and A375 cells, while  
886 silencing VARS1 suppressed the abilities. ‘\*’ represents p-value  $\leq 0.05$ . (G) GSEA  
887 analysis showing that the correlation of VARS1 expression with metastasis-related gene

888 sets.

889

890 **Figure 8 The role of VARS1 in immune cell infiltration and macrophage polariza-**

891 **tion.** (A) KEGG pathway enrichment scores between high and low VARS1 expression

892 groups analyzed using GSEA and showing the top 20 differential pathways. **Patients**

893 **were grouped into “high” or “low” groups based on the median expression of VARS1.**

894 (B) The graph shows the correlation between VARS1 expression and immune cell in-

895 filtration based on the output of Cibersort analysis. The correlation coefficients were

896 calculated by the Spearman rank correlation test. (C) The correlation of VARS1 expres-

897 sion and M2-like TAMs infiltration. (D) THP-1 cells were treated with supernatant of

898 VARS1-overexpressing A375 cells and then the polarization of THP-1 was analyzed by

899 flow cytometry. ‘\*’ represents  $p\text{-value} \leq 0.05$ .

900

901 **Figure 9 High expression of VARS1 correlates with low CD8 T cell infiltration and**

902 **predict the poor clinical benefit of ICB.** (A) The correlation of VARS1 expression

903 and M2-like TAMs infiltration. (B) Correlation between the expression of VARS1 and

904 several known immune checkpoint genes in the TCGA dataset. The correlation coeffi-

905 cients were calculated by the Pearson correlation test. (C) The submap tool analysis

906 showed that VARS1 expression could predict the response to anti-PD-1 treatment. The

907 p values obtained were adjusted by the Bonferroni method. (D) Pan-cancer analysis

908 investigating the correlations between VARS1 expression and CD8 T cell infiltration

909 across 32 cancer types from the TCGA dataset. The correlation coefficients were

910 calculated by the Spearman rank correlation test. (E) Pan-cancer GSEA analysis for  
911 immune response related pathway between high- and low-VARS1 tumor tissues. NES,  
912 normalized enrichment score; FDR, false discovery rate.
